# Supplementary material for: Genetic Diversity and Characterization of Circular Replication (Rep)-Encoding Single-Stranded (CRESS) DNA Viruses
Source: PubMed Central journal article supplement (PMC9769708; doi:10.1128/spectrum.01057-22), 2022-11-08
Supplement: spectrum.01057-22-s0010.pdf [file spectrum.01057-22-s0010.pdf]

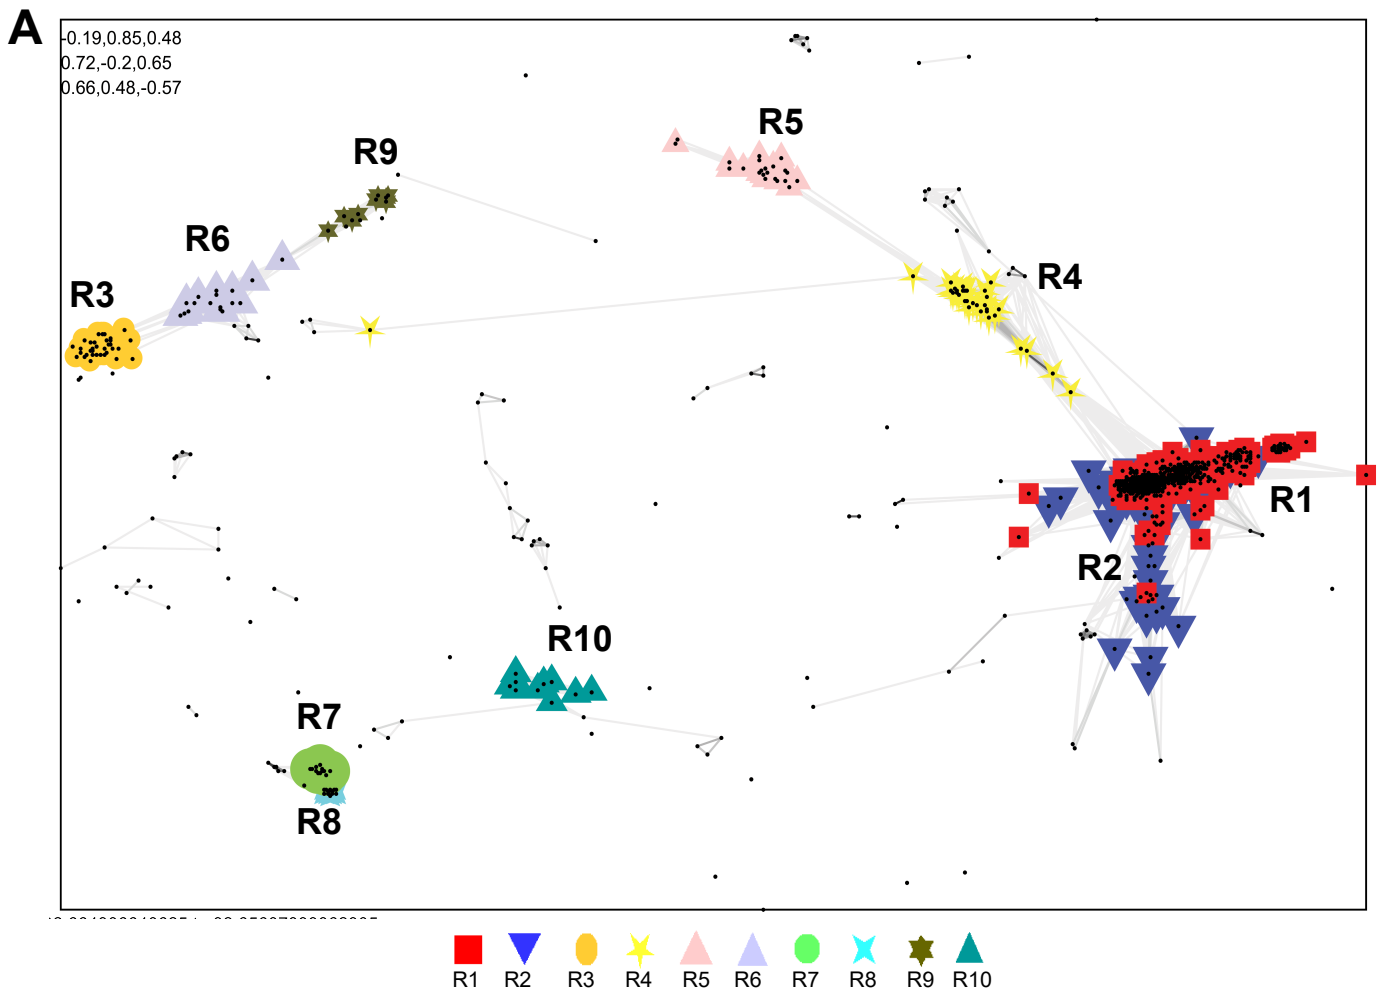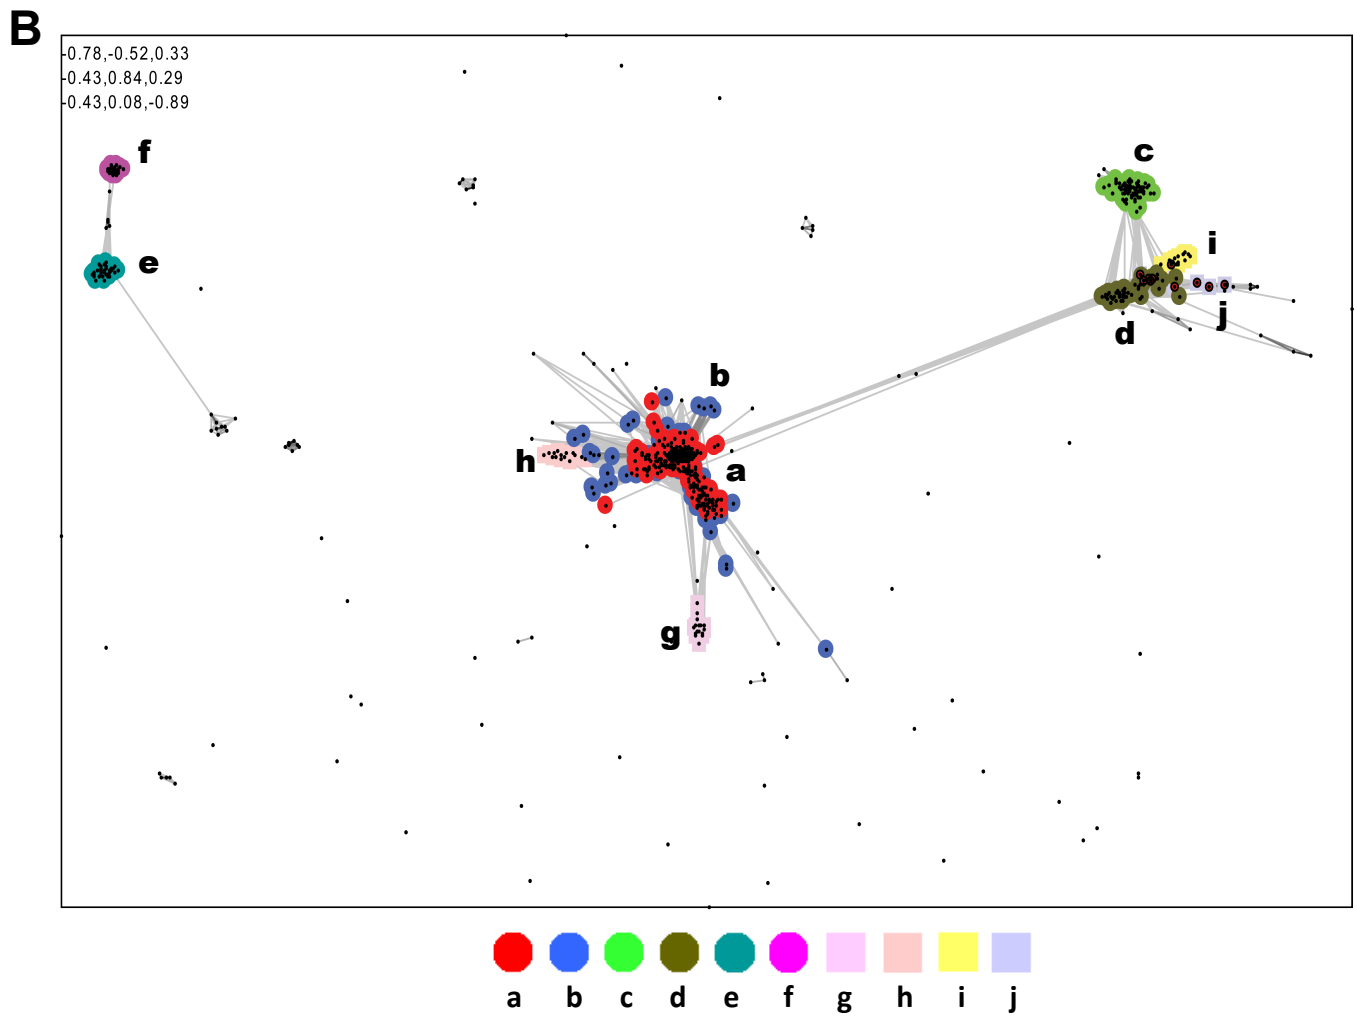

Supplementary Figure 1

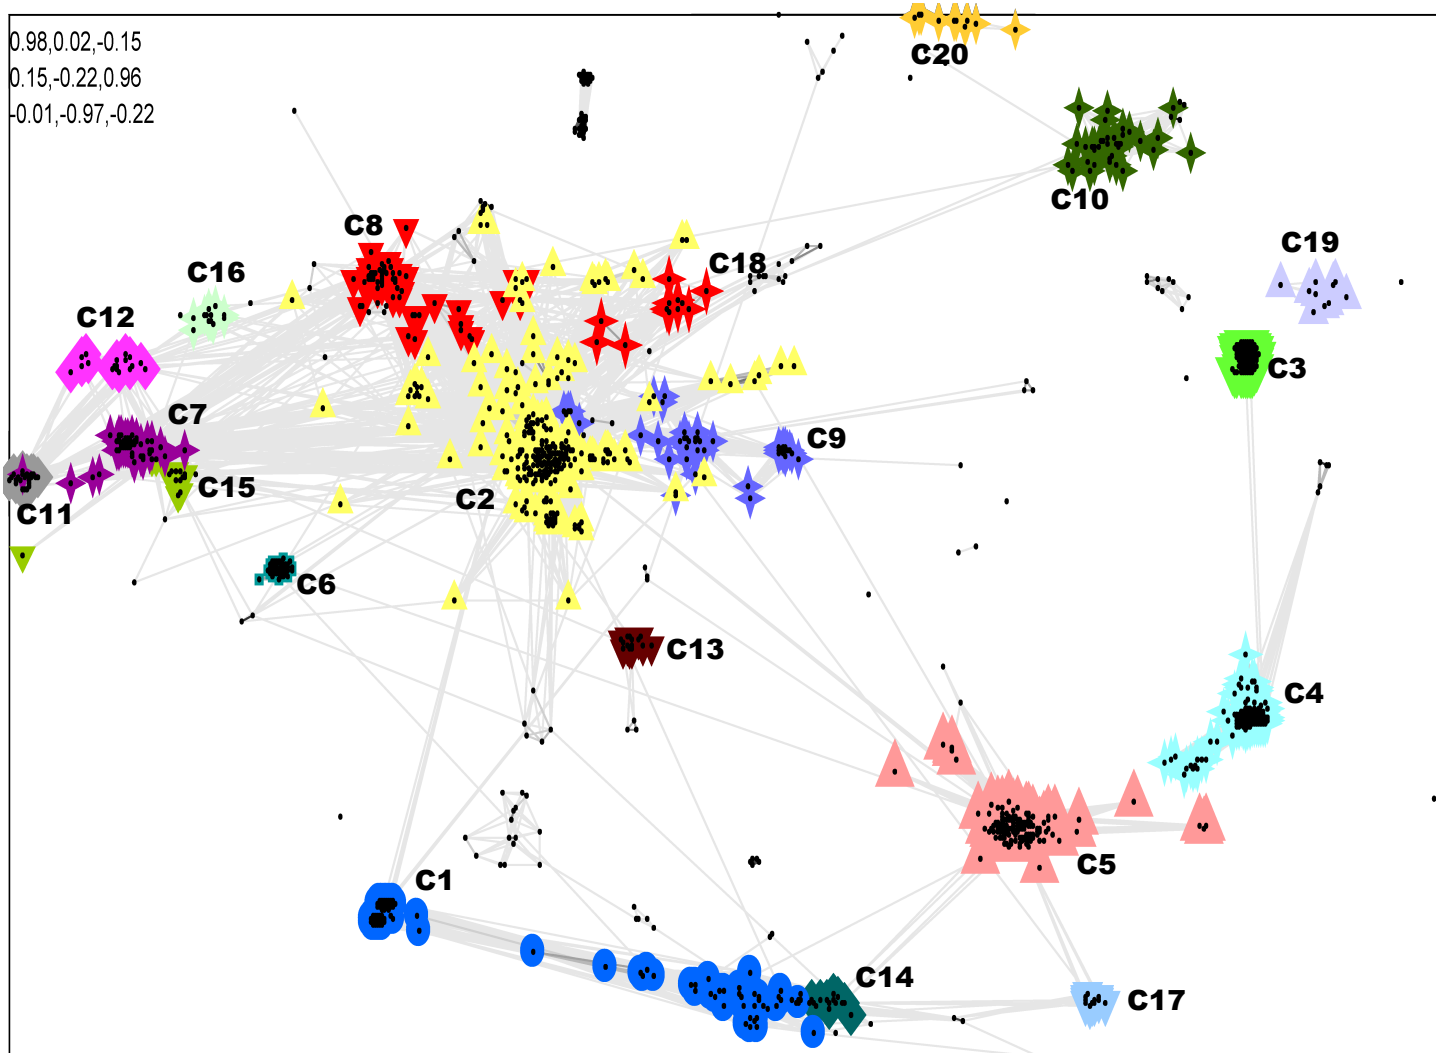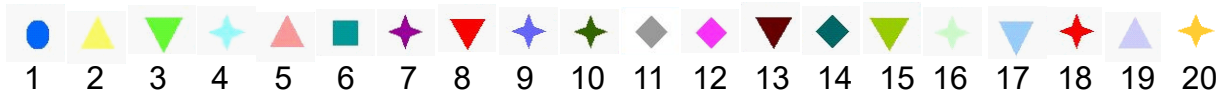

Supplementary Figure 2



**A**

Tree scale: 1

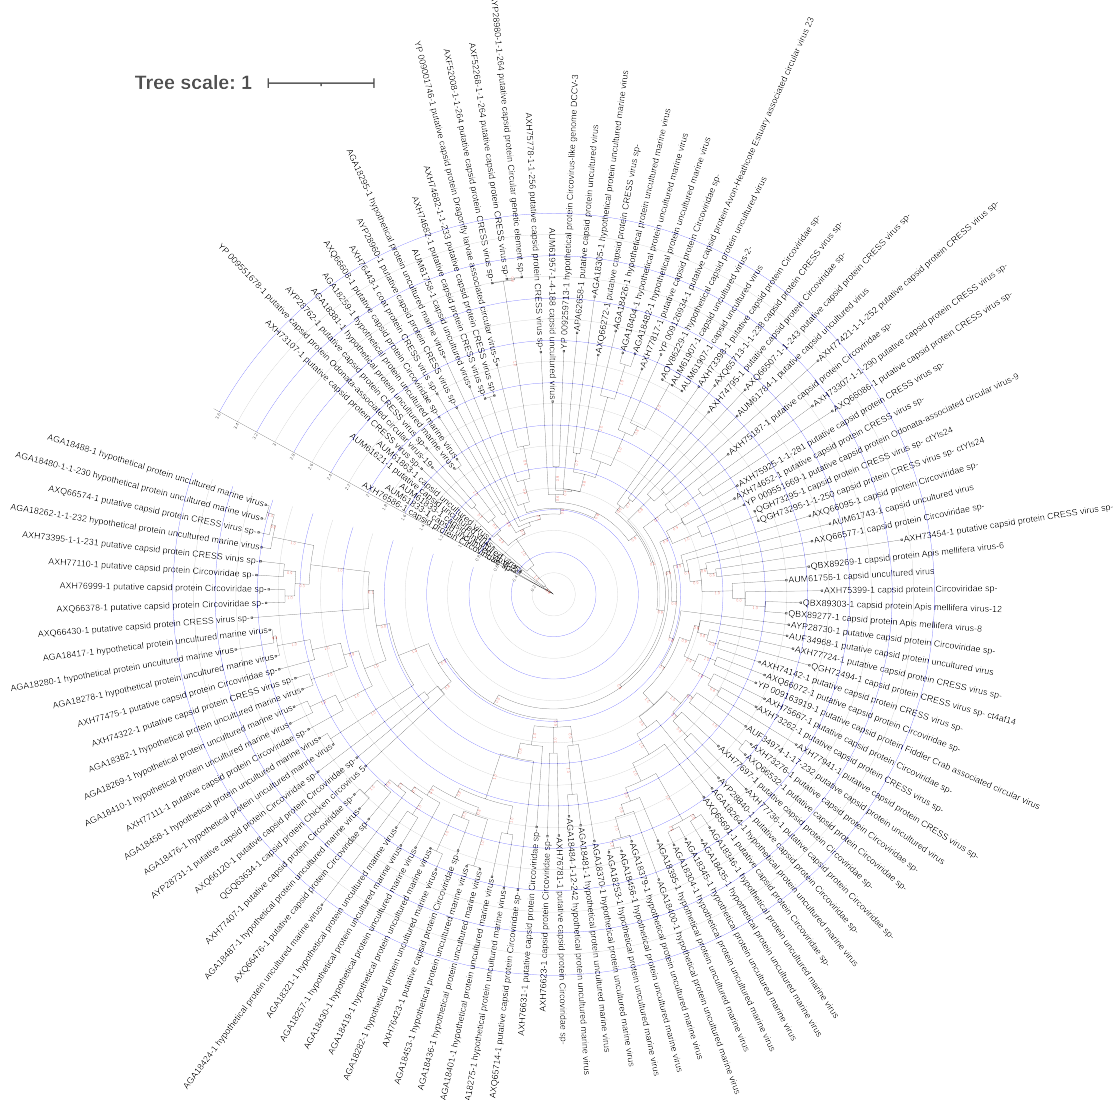

**B**

Tree scale: 1

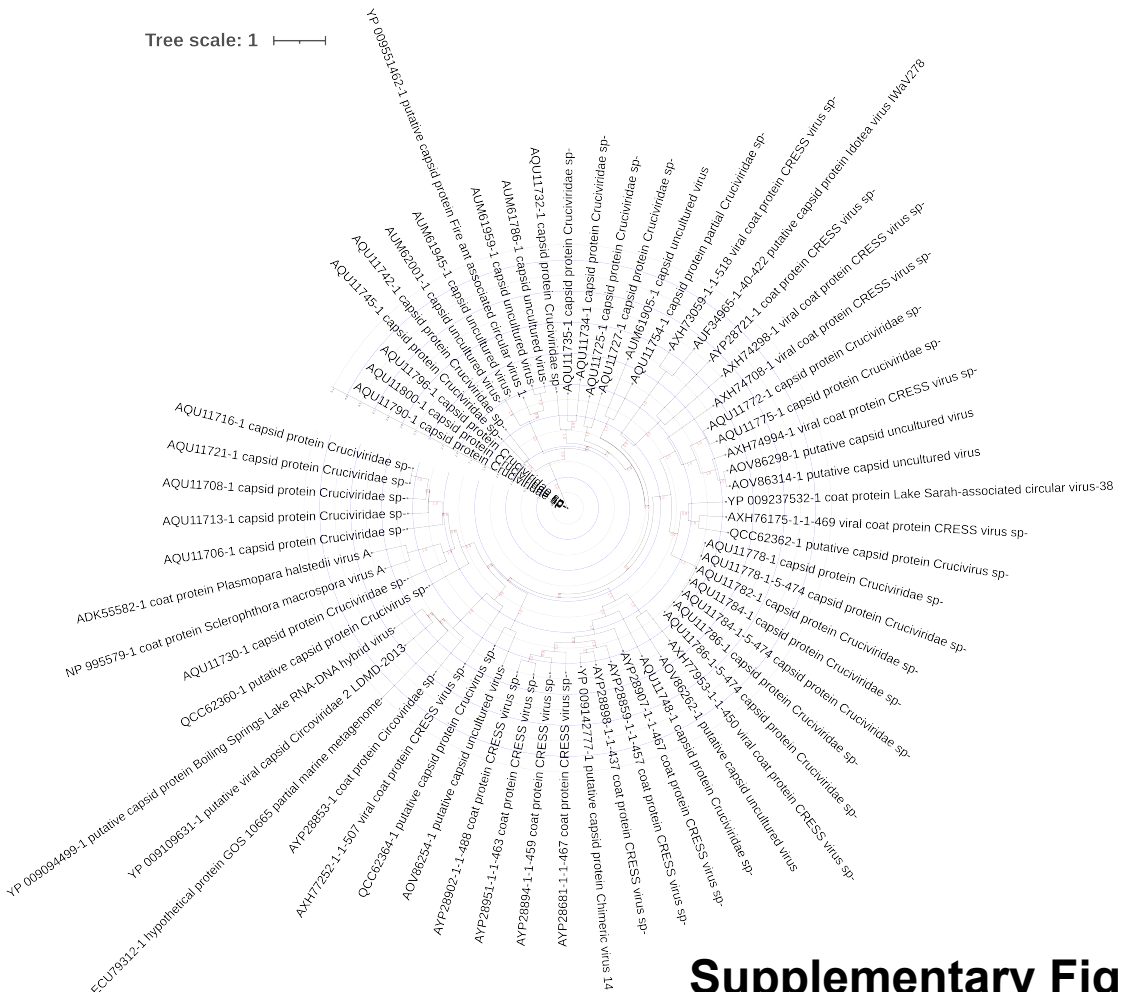

**Supplementary Figure 4**

**A**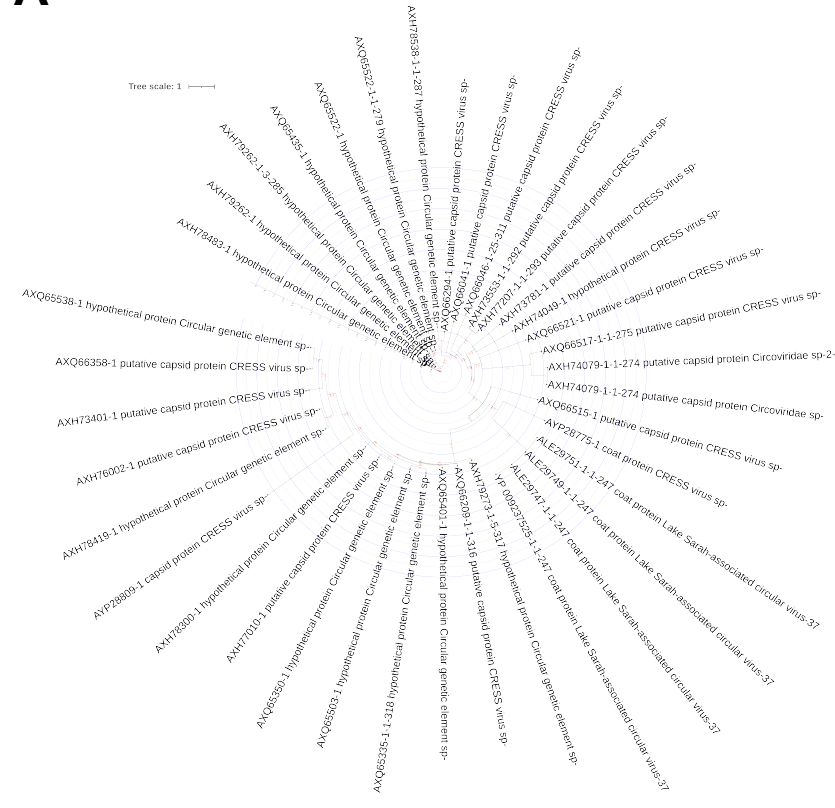**B**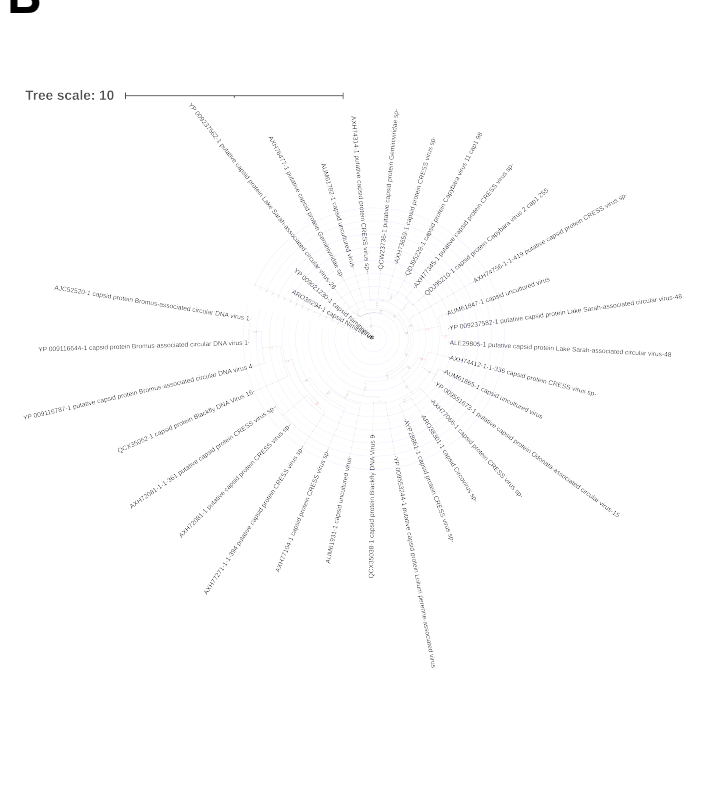**C**

Tree scale: 10

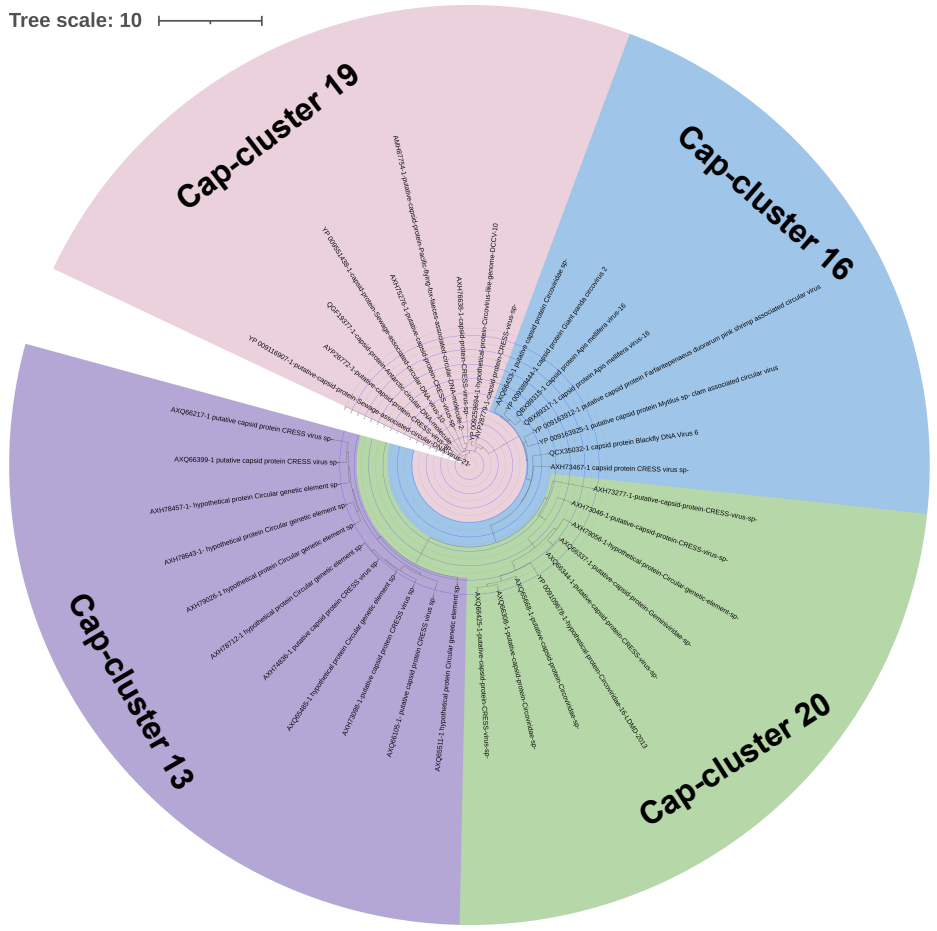**Supplementary Figure 5**

## **Supplementary Figure Legends**

**Supplementary Figure 1: Pairwise amino acid sequence similarity network-based CRESS-DNA virus classification of Rep protein of CRESS-DNA viruses.** (A) A total of 1160 amino acid sequences of Rep protein of CRESS-DNA viruses (**Supplementary Data 1**) were clustered by CLANS. The clusters were classified using the Network-based method using offset values and global average with a maximum of 10000 in CLANS Toolkit analysis. The  $P$ -value  $\leq 1e^{-05}$  was used to show the lines connecting the sequences. (B) Sub-clustering of the cluster 1 and 2 protein sequences of CRESS-DNA viruses Rep proteins into 10 different clusters (cluster **a** to **j**) at a  $P$ -value threshold of  $1e^{-38}$ .

**Supplementary Figure 2:** A total of 1823 amino acid sequences of Cap protein of CRESS-DNA viruses were (**Supplementary Data 6**) used and classified by their pairwise sequence similarity network using CLANS. The clusters were classified using the Network-based method using offset values and global average with a maximum of 10000 in CLANS Toolkit analysis. The  $P$ -value  $\leq 1e^{-02}$  was used to show the lines connecting the sequences.

**Supplementary Figure 3: Phylogenetic relationship of CRESS-DNA virus Cap protein cluster C3 and C4.** (A) Phylogenetic tree depicting the genetic relationship between the CRESS-DNA virus Cap protein cluster C3. The details of sequences in the cluster (**Supplementary Data 7**) and alignment are provided in **Supplementary Data 12**. (B) Phylogenetic tree depicting the genetic relationship between the CRESS-DNA virus Cap protein cluster C4. The details of sequences in the cluster (**Supplementary Data 7**) and alignment are provided in **Supplementary Data 13**. The maximum-likelihood method inferred the evolutionary history using the Subtree-Pruning-Regrafting algorithm and bootstrap values in PhyML 3.3\_1.

**Supplementary Figure 4: Phylogenetic relationship of CRESS-DNA virus Cap protein cluster C6 and C7.** (A) Phylogenetic tree depicting the genetic relationship between the CRESS-DNA virus Cap protein cluster C6. The details of sequences in the cluster (**Supplementary Data 7**) and alignment are provided in **Supplementary Data 14**. (B) Phylogenetic tree depicting the genetic relationship between the CRESS-DNA virus Cap protein cluster C7. The details of sequences in the cluster (**Supplementary Data 7**) and alignment are provided in **Supplementary Data 15**. The maximum-likelihood method inferred the evolutionary history using the Subtree-Pruning-Regrafting algorithm and bootstrap values in PhyML 3.3\_1.

**Supplementary Figure 5: Phylogenetic relationship of CRESS-DNA virus Cap protein cluster C10, C11 C13, C16, C19, and C20.** (A) Phylogenetic tree depicting the genetic relationship between the CRESS-DNA virus Cap protein cluster C10. The details of sequences in the cluster (**Supplementary Data 7**) and alignment are provided in **Supplementary Data 16**. (B) Phylogenetic tree depicting the genetic relationship between the CRESS-DNA virus Cap protein cluster C11. The details of sequences in the cluster (**Supplementary Data 7**) and alignment are provided in **Supplementary Data 17**. (B) Phylogenetic tree depicting the genetic relationship between the CRESS-DNA virus Cap

protein cluster C13, C16, C19, and C20. The details of sequences in each cluster (**Supplementary Data 7**) and alignment are provided in **Supplementary Data 18**. The maximum-likelihood method inferred the evolutionary history using the Subtree-Pruning-Regrafting algorithm and bootstrap values in PhyML 3.3\_1.
